# Supplementary material for: Electrochemiluminescence resonance energy transfer between luminol and black phosphorus nanosheets for the detection of trypsin via the “off–on–off” switch mode
Source: Royal Society of Chemistry journal article supplement (doi:10.1039/d0an00156b), 2020-01-01
Supplement: d0an00156b1.pdf [file d0an00156b1.pdf]

## Supporting Information

# Electrochemiluminescence Resonance Energy Transfer between Luminol and Black Phosphorus Nanosheets for Detection of Trypsin via “off-on-off” Switch System

Hui Liu, Hao Yin, YongPing Dong\*, HouCheng Ding, XiangFeng Chu\*

*School of Chemistry and Chemical Engineering, Anhui Province Key Laboratory  
of Coal Clean Conversion and High Valued Utilization, Hexian Development Institute  
of Chemical Industry, Anhui University of Technology, Maanshan243002, China*

## EXPERIMENTAL SECTION

### Preparation of BPNs

5 mg of BP powder was added into 1 mL of double-distilled water in a mortar and then ground for 20 min. The mixture was transferred to a glass vial containing 3 mL of double-distilled water. After being sealed carefully, the solution was sonicated in an ice-bath for 8 h at a power of 100 W. The final solution was centrifuged at 7000 rpm for 20 min, and then centrifuged at 11000 rpm for another 20 min. The top 75% of the solution was collected as the sample of BPNs.

## RESULTS AND DISCUSSION

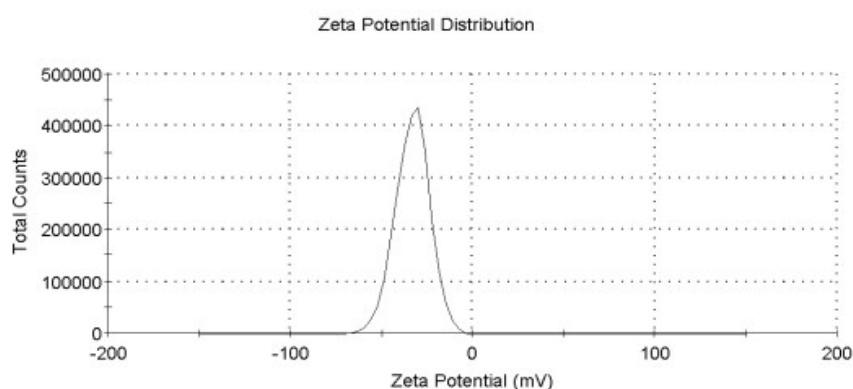

**Fig.S1** The Zeta potential of BPNs

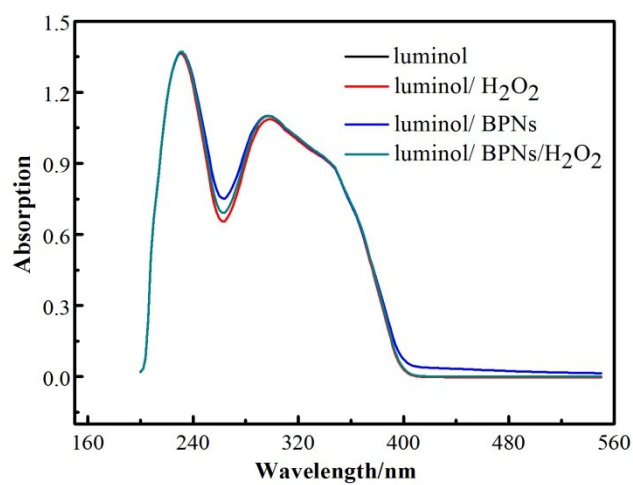

**Fig.S2** UV-vis absorption spectrum of luminol, luminol/H<sub>2</sub>O<sub>2</sub>, luminol/BPNs and the luminol/BPNs/H<sub>2</sub>O<sub>2</sub> mixing solutions.

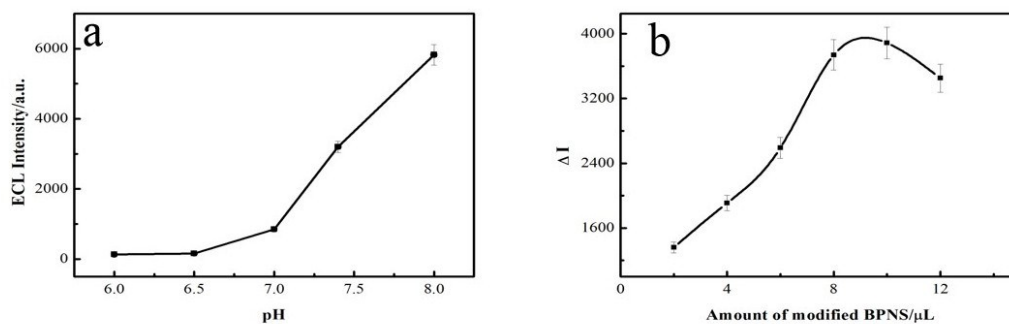

**Fig.S3** (A) Effect of the pH value on ECL intensity. (B) Effect of the modification amount of BPNs on ECL intensity. (C) Effect of the concentration of protamine on ECL intensity.(D) Effect of the incubation time on ECL intensity.

**Table S1.** Comparison of different methods for determination of trypsin.

| Methods     | Linear range<br>( $\mu\text{g/mL}$ ) | Detection limit<br>( $\mu\text{g/mL}$ ) | Reference |
|-------------|--------------------------------------|-----------------------------------------|-----------|
| Colorimetry | 0.9-1000                             | 0.6                                     | 1         |
| FL          | 0.5-20                               | 0.13                                    | 2         |
| FL          | 0-6                                  | 0.7                                     | 3         |
| FL          | 0.1-4                                | 0.04                                    | 4         |

|                  |                               |                           |            |
|------------------|-------------------------------|---------------------------|------------|
| Electrochemistry | 0.5-100                       | 0.5                       | 5          |
| ECL              | $1 \times 10^{-3}$ -1.5 U /mL | $8.4 \times 10^{-4}$ U/mL | 6          |
| ECL              | 0.1-5                         | 0.06                      | This paper |

## References

- (1) G. L. Wang, L. Y. Jin, Y. M. Dong, X. M. Wu and Z. J. Li, *Biosens. Bioelectron.* 2015, **64**, 523-529.
- (2) L. F. Zhang, H. Y. Qin, W. W. Cui, Y. Zhou and J. X. Du, *Talanta* 2016, **161**, 535-540.
- (3) C. Y. Poon, Q. H. Li, J. L. Zhang, Z. P. Li, C. Dong, A. W. Lee, W. H. Chan and H. W. Li, *Anal Chim. Acta.* 2016, **917**, 64-70.
- (4) Y. B. Liu, F. M. Zhang, X. He, P. Y. Ma, Y. B. Huang, S. Tao, Y. Sun, X. H. Wang and D. Q. Song, *Sens. Actuators, B* 2019, **294**, 263-269.
- (5) B. A. Zaccaro and R. M. Crooks, *Anal Chem* 2011, **83**, 1185-1188.
- (6) M. Cheng, J. Zhou, X. M. Zhou and D. Xing, *Sens. Actuators, B* 2018, **262**, 516-521.
